# Supplementary material for: Human Colonoid–Myofibroblast Coculture for Study of Apical Na+/H+ Exchangers of the Lower Cryptal Neck Region
Source: MDPI journal article supplement (doi:10.3390/ijms24054266), 2023-02-21
Supplement: s1 [file s1]

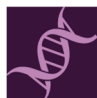

Article

# Human Colonoid–Myofibroblast Coculture for Study of Apical $\text{Na}^+/\text{H}^+$ Exchangers of the Lower Cryptal Neck Region

Azam Salari <sup>1</sup>, Kunyan Zhou <sup>1,2</sup>, Katerina Nikolovska <sup>1</sup>, Ursula Seidler <sup>1,\*</sup> and Mahdi Amiri <sup>1,\*</sup>

<sup>1</sup> Department of Gastroenterology, Hepatology and Endocrinology, Hannover Medical School, 30625 Hannover, Germany

<sup>2</sup> Department of Thyroid Surgery, The First Affiliated Hospital, School of Medicine, Zhejiang University, Hangzhou 310027, China

\* Correspondence: seidler.ursula@mh-hannover.de (U.S.); amiri.mahdi@mh-hannover.de (M.A.); Tel.: +49-511-532-9427; Fax: +49-511-532-8428 (U.S.)

## Supplementary Materials

**Table S1.** Sequence of primers used for RT-qPCR experiments.

| Gene               | Forward Primer           | Reverse Primer           |
|--------------------|--------------------------|--------------------------|
| <i>ACTB</i>        | CGAGGACTTTGATTGCACATTGTT | TGGGGTGGCTTTTAGGATGG     |
| <i>AE2</i>         | TGCCAAAGGTTCACACA        | CAACTCATTAGCTCCACAAAC    |
| <i>ALPI</i>        | CGCTTTAACCAGTGCAACAC     | GTCACCACTCCTACTGACTTTC   |
| <i>CFTR</i>        | CTACCACTGGTGCATACTCTAATC | ACGTGTTGAGGGTTGACATAG    |
| <i>CLDN1</i>       | CTGGGAGGTGCCCTACTTTG     | ACACGTAGTCTTCCCGCTG      |
| <i>CLDN2</i>       | GATCCTACGGGACTTCTACTCA   | CAGGGAGAACAGGGAAGAAATAA  |
| <i>CLDN3</i>       | ACGCGAGAAGAAGTACACGG     | TAGACGTAGTCCTTGCGGTC     |
| <i>CLDN4</i>       | TTCTACAATCCGCTGGTGGC     | GCGGAGTAAGGCTTGTCTGT     |
| <i>CLDN7</i>       | GGGGGAGACGACAAAGTGAA     | CATACCAGGAGCAAGCTACCA    |
| <i>CLDN8</i>       | TGCCCAAAAACGTGAGCTTG     | TGTGCGATGGGAAGGTATCG     |
| <i>GAPDH</i>       | TGCACCACCAACTGCTTAGC     | GGCATGGACTGTGGTCATGAG    |
| <i>GREM1</i>       | GCAAGCCCAAGAAATTCCTACTAC | TGCAACGACACTGCTTCA       |
| <i>KI67</i>        | GACCTCAAACCTGGCTCCTAATC  | GCTGCCAGATAGAGTCAGAAAG   |
| <i>LGR5</i>        | CCTGCTTGACTTTGAGGAAGACC  | CCAGCCATCAAGCAGGTGTTCA   |
| <i>LYZ</i>         | GGCTTGTCTCTCTTCTGTTA     | GTAGCCATCCATTCCCAATCT    |
| <i>MUC2</i>        | AGTTTGGGGAGCACTTCGAG     | TCTTCCACGCAGTGGGTAAC     |
| <i>NBCe1</i>       | CCGGCTTTGTTGGTCACTAT     | CAAGTGATACCCTGCTCCTTTC   |
| <i>NBCn1</i>       | CTGCTATTCTGCTTTGCTTTG    | GTGATAGCCAGCTCCTTTCTT    |
| <i>NHE1</i>        | GCTGGTGGCAGACCCCTACGA    | ATAGGCCAGTGGGTCTGAGCCGA  |
| <i>NHE2</i>        | TGTCTACCGTGGGCAAGAAC     | AACGCAAAACAGATGGCACC     |
| <i>NHE3</i>        | ACCGTGCGCTACACCATGAAGATG | ATGCGGTAGCGGTTGAGAAGCC   |
| <i>NHE8</i>        | CATGTGTGTTTGCAATTTCTTGGC | AGCACTATGCACCAGATGACA    |
| <i>NKCC1</i>       | AAAGGAACATTCAAGCACAGC    | CTAGACACAGCACCTTTTCGTG   |
| <i>OCN</i>         | TCGACCAATGCTCTCTCAGC     | CTCCTGGAGGAGAGGTCCAT     |
| <i>PDGFRA</i>      | CTTGTGTCAGTGTGCCTCTTG    | GTTACCTTCTGTGGCCTATTA    |
| <i>RSPO3</i>       | GAAAGAGGAGAAAGGAAGGGAAG  | GGCTGCCGATGTATTCCATAA    |
| <i>SI</i>          | CGCTACACCTTATTACCCTTCC   | CCAGCTGTTTCGTATCCTCATAAA |
| <i>SLC26A3</i>     | CCAGCGTCTATTCCCTCAAAT    | TCCCAGCAAATCCTCTGAATAC   |
| <i>SLC26A6</i>     | AGAAACTGCTCAAGAAGCAGGA   | CCATCTTATCTCCTGAGCTCACC  |
| <i>THY1 (CD90)</i> | TGACCCGTGAGACAAAGAAG     | GCTAGTGAAGGCGGATAAGTAG   |
| <i>WNT2B</i>       | CCTTGGAGTGGTAGCCATAAG    | AACGCTGACTGTGTAGGTATG    |
| <i>WNT5a</i>       | GTGATGCAGATAGGCAGCCG     | GCCATAGTCGATGTTGTCGC     |
| <i>ZO-1</i>        | CCTGAGTTTGACAGTGGAGTT    | GCTGAAGGACTCACAGGAATAG   |

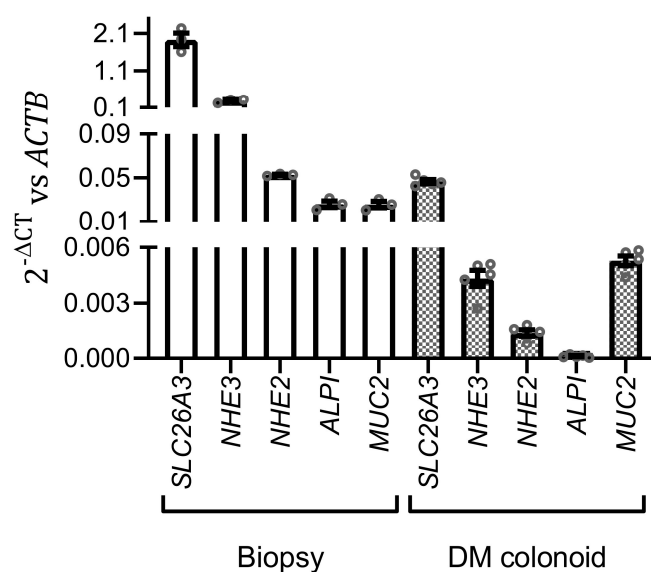

**Figure S1.** *SLC26A3* mRNA is highly expressed in human colon. RT-qPCR analysis of human transverse colon biopsy material from which the colonoids were derived shows that among the selected panel of genes, *SLC26A3* has substantially higher expression levels. Similarly in differentiated colonoid monolayers, *SLC26A3* expression is drastically higher than other differentiation marker genes including *NHE3*, *MUC2* or *ALPI*.

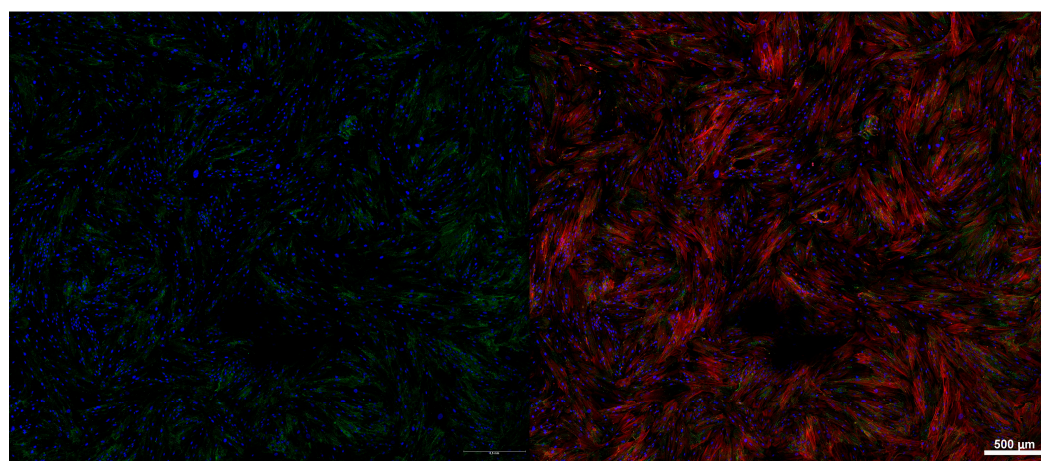

**Figure S2.** Majority of the cells in the myofibroblast culture used in CM-CE cocultures are CD90-positive. This immunofluorescent image shows intestinal myofibroblasts from the lamina propria of human transverse colon stained for nuclei (blue), CD90 (green) and F-actin (red). The image is generated by stitching multiple tile scan acquisitions to cover a broad area of the culture. The left and right panels are identical, except that in the left panel the F-actin signal is excluded for a better visualization of the CD90 signal. The majority of the myofibroblasts are positively stained for CD90.

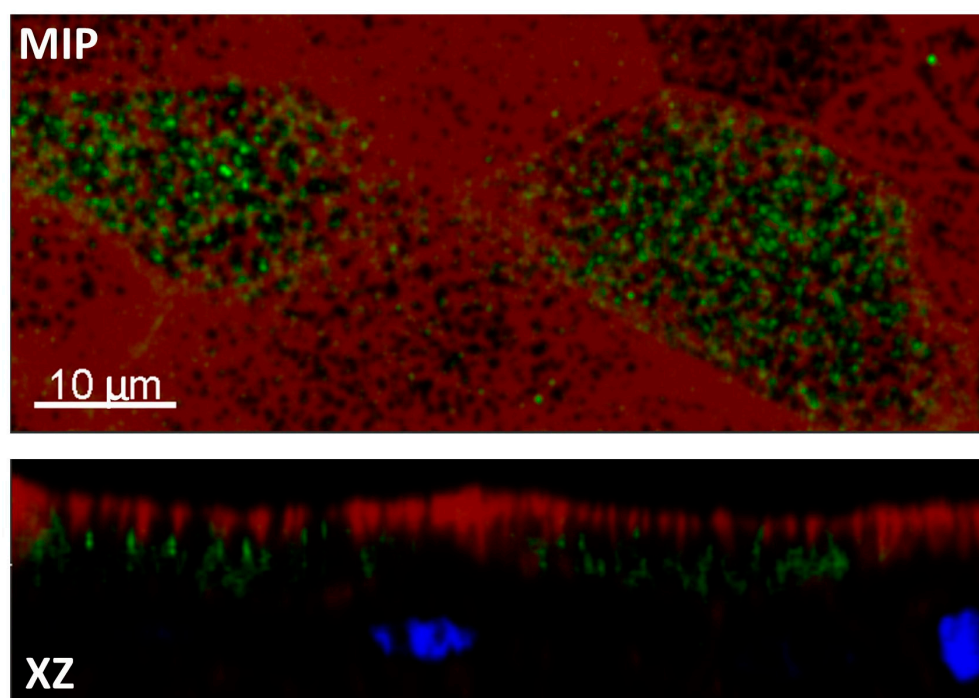

**Figure S3.** immunohistochemical staining of NHE8 in human CM-CE monolayers. Maximum intensity projection (MIP) and XZ cross section of CM-CE monolayer. NHE8 is detected as organellar structure mainly distributed between nucleus and subapical region. Green: NHE8, Red: F-actin, Blue: nuclei (excluded in MIP).
